# Supplementary material for: Blockchain based clinical trial management system: A scoping review and conceptual framework
Source: bioRxiv or medRxiv preprint supplement (doi:10.1101/2024.06.12.24308813), 2024-06-12
Supplement: Supplementary file [file media-1.pdf]

## Supplementary Material

Blockchain based clinical trial management system:  
A scoping review and conceptual framework

### S1 Appendix - Wikipedia links for further reading

- Blockchain: <https://en.wikipedia.org/wiki/Blockchain>
- Clinical trial management system:  
[https://en.wikipedia.org/wiki/Clinical\\_trial\\_management\\_system](https://en.wikipedia.org/wiki/Clinical_trial_management_system)
- Smart contract: [https://en.wikipedia.org/wiki/Smart\\_contract](https://en.wikipedia.org/wiki/Smart_contract)
- InterPlanetary File System:  
[https://en.wikipedia.org/wiki/InterPlanetary\\_File\\_System](https://en.wikipedia.org/wiki/InterPlanetary_File_System)
- Bitcoin: <https://en.wikipedia.org/wiki/Bitcoin>
- Ethereum: <https://en.wikipedia.org/wiki/Ethereum>
- Hyperledger: <https://en.wikipedia.org/wiki/Hyperledger>
- Distributed ledger: [https://en.wikipedia.org/wiki/Distributed\\_ledger](https://en.wikipedia.org/wiki/Distributed_ledger)

## S2 Table

**S2 Table. List of variables in the data extraction sheet and their description**

| <b>SN</b> | <b>Data item</b>      | <b>Description</b>                                      |
|-----------|-----------------------|---------------------------------------------------------|
| 1         | Year                  | Year of publication of the article                      |
| 2         | First author          | First author of the article                             |
| 3         | Country               | Country of the first author                             |
| 4         | Study objective       | Objective of the research with a real-world application |
| 5         | Study design          | Proof of concept/Clinical trial/application             |
| 6         | Name of blockchain    | Hyperledger/Ethereum/Bitcoin/Other                      |
| 7         | Type of blockchain    | Private/Consortium/Public                               |
| 8         | Consensus mechanism   | Proof of Work/Proof of stake/Other                      |
| 9         | Use of smart contract | Yes/No - with description                               |
| 10        | Data storage          | Centralized or decentralized data storage               |
| 11        | Summary / Conclusion  | The summary or conclusion of the proposed solution      |
| 12        | Research contribution | Our appraisal of the proposed solution                  |

### S3 Table

**S3 Table. Clinical trial case record form used for Blockchain simulation\***

| Q.No.                          | Question                                                                  | Answer              |
|--------------------------------|---------------------------------------------------------------------------|---------------------|
| <b>ENROLEMENT</b>              |                                                                           |                     |
| 1                              | Do you have the Long COVID symptom of fatigue?                            | Yes / No (End form) |
| 2                              | Consent                                                                   | Yes / No (End form) |
| <b>BASELINE Data</b>           |                                                                           |                     |
| 3                              | Participant enrolment number                                              | LC001               |
| 4                              | Group (Allotted by randomization)                                         | A / B               |
| 5                              | Date of Enrolment                                                         | DD/MM/YYYY          |
| 6                              | Age in completed years                                                    | Integer             |
| 7                              | Sex                                                                       | Male/Female/Other   |
| 8                              | Highest level of education completed?                                     | Open                |
| 9                              | Do you have history of allergy?                                           | Yes / No            |
| 10                             | Did you receive Covid-19 vaccine?                                         | Yes / No            |
| 11                             | Any diagnosed disease or co-morbidities?                                  | Yes / No            |
| <b>FOLLOW-UP after 1 month</b> |                                                                           |                     |
| 12                             | Date of final follow-up                                                   | DD/MM/YYYY          |
| 13                             | Number of antihistamine tablets taken:                                    | Integer             |
| 14                             | Do you have the Long COVID symptom of fatigue during the final follow-up? | Yes / No            |

\*Title of the study used for simulation: Antihistamines for treatment of Long COVID fatigue – A placebo controlled double blinded Randomized Controlled Trial

Simulation link: [https://github.com/ictashik/BlockChain\\_ClinicalTrial](https://github.com/ictashik/BlockChain_ClinicalTrial)
